# Supplementary material
Source: PubMed Central journal article supplement (PMC8568740)
Supplement: NIHMS1709803-supplement-SI.pdf [file NIHMS1709803-supplement-SI.pdf]

## Table of contents

|                                        |    |
|----------------------------------------|----|
| Bill of Materials .....                | S2 |
| Wye Connection to NMR tube .....       | S3 |
| Drawing of the PCB .....               | S4 |
| Photograph of Experimental Setup ..... | S5 |

## Bill of Materials

| Part Name                                                                                                              | Supplier                            | Vendor                          | Part No.         | Link                                                                                                                                                                                                                                                                                                                                                                                                                              | Quantity/set | Cost Each (USD) | Cost Total (USD) |
|------------------------------------------------------------------------------------------------------------------------|-------------------------------------|---------------------------------|------------------|-----------------------------------------------------------------------------------------------------------------------------------------------------------------------------------------------------------------------------------------------------------------------------------------------------------------------------------------------------------------------------------------------------------------------------------|--------------|-----------------|------------------|
| 1) AC inlet connector; 250 VAC; 10A; 10 MΩ/min                                                                         | Allied Electronics & Automation     | Schurter                        | 6100.3200        | <a href="https://www.alliedelec.com/product/schurter/6100-3200/70080619/">https://www.alliedelec.com/product/schurter/6100-3200/70080619/</a>                                                                                                                                                                                                                                                                                     | 2            | \$1.19          | \$2.38           |
| 2) Push-button switch                                                                                                  | Allied Electronics & Automation     | Carling Technologies            | P27A-BL          | <a href="https://www.alliedelec.com/product/carling-technologies/p27a-bl/70131572/">https://www.alliedelec.com/product/carling-technologies/p27a-bl/70131572/</a>                                                                                                                                                                                                                                                                 | 1            | \$5.08          | \$5.08           |
| 3) Capacitor, Nichicon 470μF / 250V                                                                                    | Amazon                              | Nichicon                        | UPW2E471MRD      | <a href="https://www.amazon.com/Nichicon-UPW2E471MRD-470uf-Capacitor-Radial/dp/B0052GKSZE/ref=sr_1_29?">https://www.amazon.com/Nichicon-UPW2E471MRD-470uf-Capacitor-Radial/dp/B0052GKSZE/ref=sr_1_29?</a>                                                                                                                                                                                                                         | 1            | \$10.28         | \$10.28          |
| 4) Thermistor, Aexit MZ73-9RM 9Ω / 270V, pack of 5 units (3-4 pcs are needed for 1 set)                                | Amazon                              |                                 | B07DDBBD7B       | <a href="https://www.amazon.com/Aexit-Resistors-MZ73-9RM-Degaussing-Single/dp/B07DDBBD7B/ref=sr_1_10?dchild=1&amp;keywords=thermistors+MZ73&amp;qid=1605905346&amp;sr=8-10">https://www.amazon.com/Aexit-Resistors-MZ73-9RM-Degaussing-Single/dp/B07DDBBD7B/ref=sr_1_10?dchild=1&amp;keywords=thermistors+MZ73&amp;qid=1605905346&amp;sr=8-10</a>                                                                                 | 1            | \$11.56         | \$11.56          |
| 5) LED; Panel Mount; Wire Leads; Snap Fit; Green                                                                       | VCC (Visual Communications Company) | Allied Electronics & Automation | 5100H5           | <a href="https://www.alliedelec.com/product/vcc-visual-communications-company-/5100h5/70130261/">https://www.alliedelec.com/product/vcc-visual-communications-company-/5100h5/70130261/</a>                                                                                                                                                                                                                                       | 1            | \$1.70          | \$1.70           |
| 6) Diode; Chanzon HER 208; 2A / 1000V; pack of 100 units, need 1 pc per set                                            | Amazon                              | Chanzon                         | HER208-DO-15-100 | <a href="https://www.amazon.com/100-Pieces-HER208-Efficiency-Electronic/dp/B079KDKPF4/ref=sr_1_1?dchild=1&amp;keywords=HER208&amp;qid=1605905974&amp;sr=8-1">https://www.amazon.com/100-Pieces-HER208-Efficiency-Electronic/dp/B079KDKPF4/ref=sr_1_1?dchild=1&amp;keywords=HER208&amp;qid=1605905974&amp;sr=8-1</a>                                                                                                               | 1            | \$8.90          | \$8.90           |
| 7) Plastic electric junction box, Ogrmar Dustproof IP65 (7.8"x 4.7"x 3")                                               | Amazon                              | Ogrmar                          | 43237-2          | <a href="https://www.amazon.com/Ogrmar-Plastic-Dustproof-Junction-Enclosure/dp/B07875F7YZ/ref=sr_1_27_sspa?keywords=electrical+boxes+plastic+8+inches&amp;qid=1554319519&amp;s=gateway&amp;sr=8-27-spons&amp;psc=1">https://www.amazon.com/Ogrmar-Plastic-Dustproof-Junction-Enclosure/dp/B07875F7YZ/ref=sr_1_27_sspa?keywords=electrical+boxes+plastic+8+inches&amp;qid=1554319519&amp;s=gateway&amp;sr=8-27-spons&amp;psc=1</a> | 1            | \$12.99         | \$12.99          |
| 8) EDGELEC 100pcs 750 ohm Resistor 1/2w (0.5Watt) ±1% Tolerance Metal Film Fixed Resistor (1 pc is needed per board)   | Amazon                              | EDGELEC                         | EFR-W0D50-A:MF   | <a href="https://www.amazon.com/EDGELEC-Resistor-Tolerance-Multiple-Resistance/dp/B07QJ9Z7HF?th=1">https://www.amazon.com/EDGELEC-Resistor-Tolerance-Multiple-Resistance/dp/B07QJ9Z7HF?th=1</a>                                                                                                                                                                                                                                   | 1            | \$6.49          | \$6.49           |
| 9) Circuit Board (this piece is enough to make several copies) One Copper Clad Side, 18" Long x 12" Wide x 1/16" Thick | McMasterCarr                        |                                 | 8521K69          | <a href="https://www.mcmaster.com/8521K69/">https://www.mcmaster.com/8521K69/</a>                                                                                                                                                                                                                                                                                                                                                 | 1            | \$12.90         | \$12.90          |
|                                                                                                                        |                                     |                                 |                  |                                                                                                                                                                                                                                                                                                                                                                                                                                   |              |                 |                  |
| <b>Grand Total</b>                                                                                                     |                                     |                                 |                  |                                                                                                                                                                                                                                                                                                                                                                                                                                   |              |                 | <b>\$72.28</b>   |

### Wye Connection to NMR tube

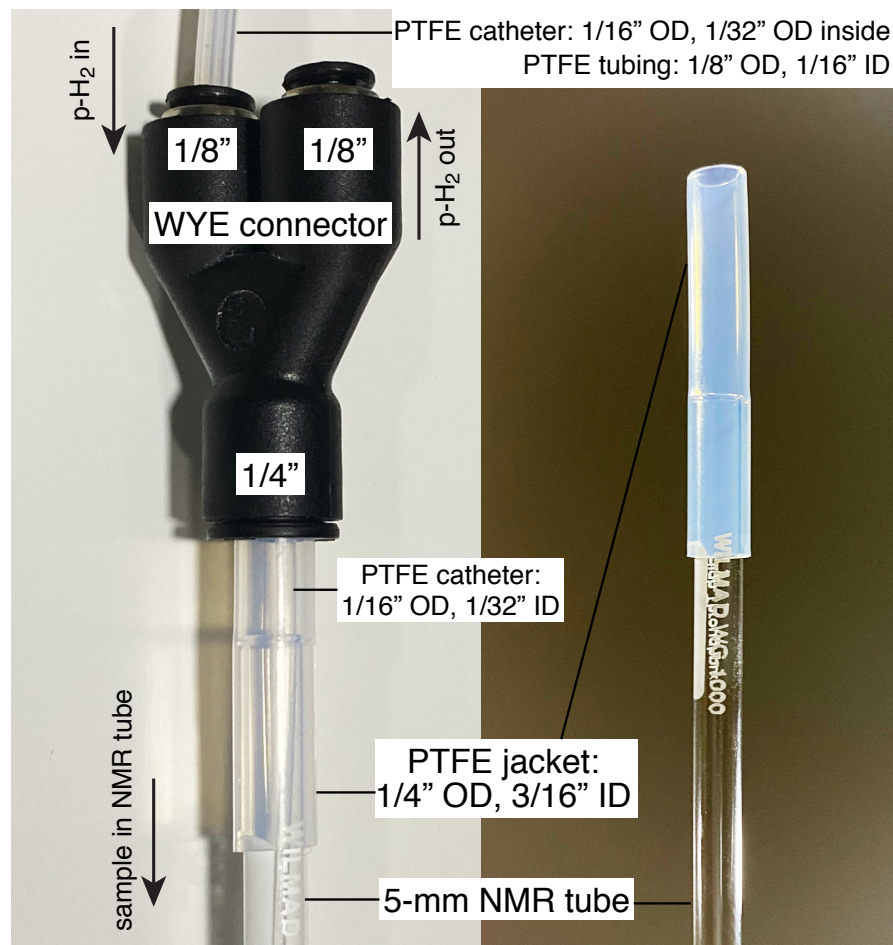

**Figure S1.** Wye connection of for parahydrogen ( $p\text{-H}_2$ ) bubbling in a Teflon jacketed 5-mm NMR tube. We have employed the following components for this setup. Wye Reducer, for 1/4" x 1/8" Tube OD (McMaster-Carr: 5779K262), PTFE 1/4" OD 3/16" ID tubing for jacket (McMaster-Carr: 5239K12), PTFE 1/16" OD 1/32" ID catheter (McMaster-Carr: 5239K23), PTFE 1/16" ID, 1/8" OD semi-clear tubing (McMaster-Carr: 5239K24), Wilmad economy 5 mm NMR tube (Wilmad WG-1000-8).

### Drawing of the PCB

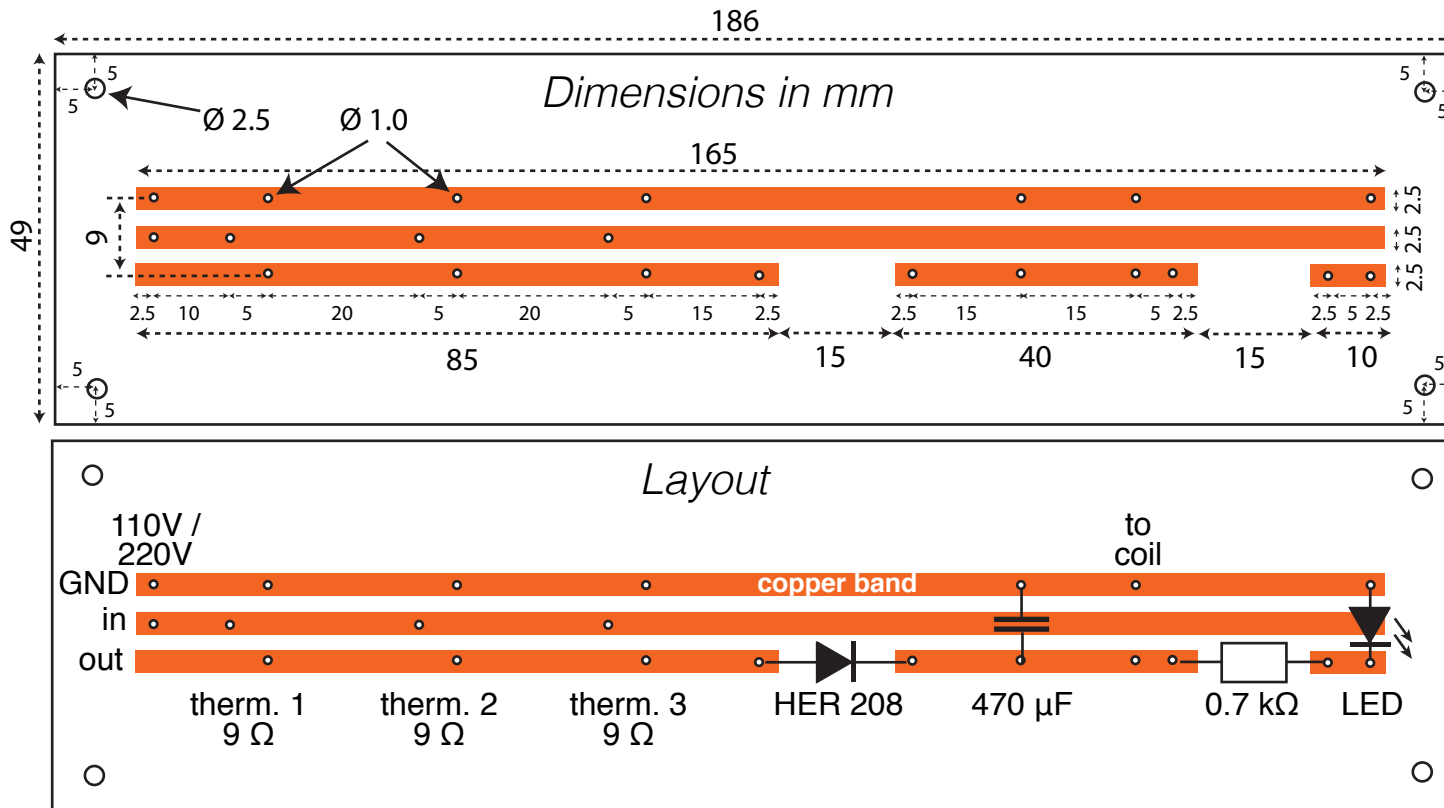

### Degaussing Circuit Board

**Figure S2.** Drawing and layout of PCB for mounting of electronics components for the circuit.

## Photograph of Experimental Setup

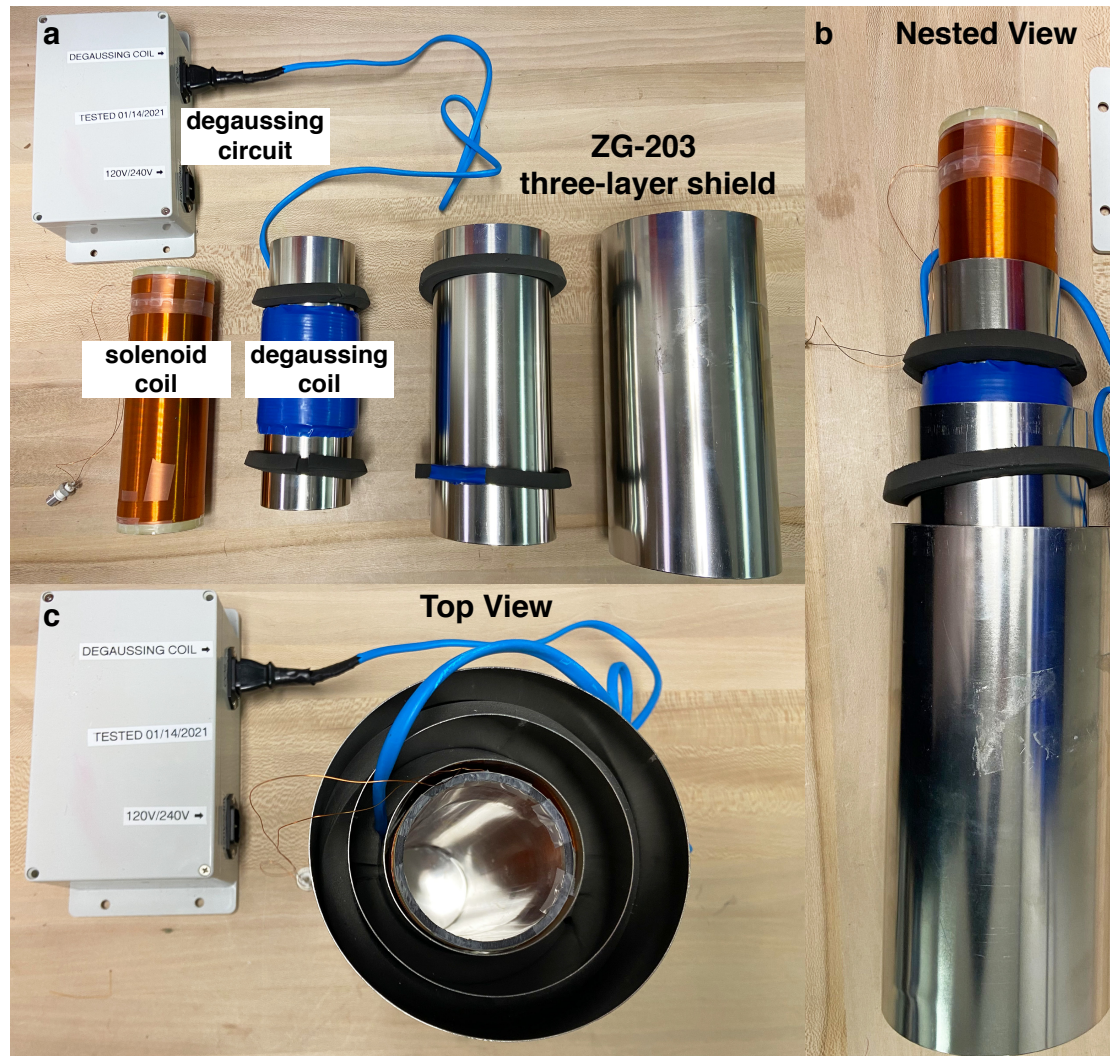

**Figure S3.** Annotated photographs of three-layer mu-metal shield (Magnetic Shield Corp., P/N ZG-203) equipped with vendor's with degaussing coil: a) view of the disassembled setup showing the connection of the degaussing coil to the degaussing circuit in the electric enclosure; b) nested view of the partially assembled me-metal shield equipped with degaussing (blue) and RF solenoid (dark amber) coils; c) top view of the assembled setup;
